# Supplementary material for: Regulation of neuronal axon specification by glia-neuron gap junctions in C. elegans
Source: eLife journal article supplement (doi:10.7554/elife.19510), 2016-10-21
Supplement: supp [file elife-19510-supp-v1.zip]

A

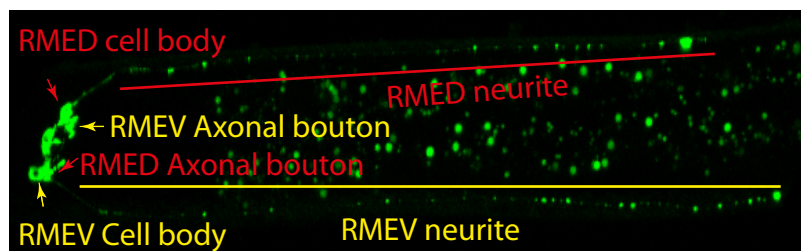

■ D/V  
■ Axonal bouton  
■ Cell body

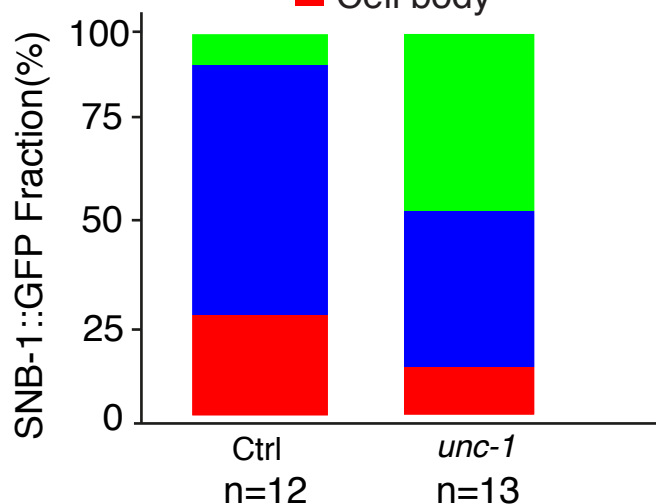

B

|                                   |                                                                   |
|-----------------------------------|-------------------------------------------------------------------|
| <i>H. sapiens</i> -NP_004090.4    | -----                                                             |
| <i>M. musculus</i> AAC64173.1     | -----                                                             |
| <i>D. melanogaster</i> AFH04298.1 | MPDSMMDMEHRDHLHRQQQQSHHHQPPRLTASTSTFAPPAPAGSQSEERDRDRDRERDH       |
| <i>C. elegans</i> NP_509202.1     | -----                                                             |
| <i>H. sapiens</i> -NP_004090.4    | -----                                                             |
| <i>M. musculus</i> AAC64173.1     | -----                                                             |
| <i>D. melanogaster</i> AFH04298.1 | HLHHHQSNNVASSPLPVTASIQLHQQQPQQQQQQQPLTQLQQPQLREREHHQQQQQQQQQ      |
| <i>C. elegans</i> NP_509202.1     | -----                                                             |
| <i>H. sapiens</i> -NP_004090.4    | -MAEKRHTRDSEA--QRLPDSFK-----DSPS                                  |
| <i>M. musculus</i> AAC64173.1     | -MSVKRQSSSHVQS--QRIPESFR-----ENSK                                 |
| <i>D. melanogaster</i> AFH04298.1 | MMQQPQQQQQQMQQPQQQLPHSHHALMQSQQQQA I HRAEARRD TQAKHSHGFLYSDEEIS   |
| <i>C. elegans</i> NP_509202.1     | -MSNKERTEPQWVTPSSNQDVPP-----DYE                                   |
| <i>H. sapiens</i> -NP_004090.4    | KGLGPCGWILVAFSFLFTVITFPISIWMCIKIKEYERAII FRLGRILQGGAKGPGLF FFI    |
| <i>M. musculus</i> AAC64173.1     | TELGAAGWILVAASFFVVIITFPISIWMCIKIVKEYERVII FRLGRILQGGAKGPGLF FFI   |
| <i>D. melanogaster</i> AFH04298.1 | DKASTCGKLLIFLSVALVIMTLFPFSLFVCFKVVQYEYERAVI FRLGRILMQGGAKGPGI FFI |
| <i>C. elegans</i> NP_509202.1     | TIGTIFGYALQALSWLIIIVTFPFSMCVCLKVIKEYERVVIFRIGRLVFGGARGPGLFI       |
| <i>H. sapiens</i> -NP_004090.4    | LPCTDSFIKVD MRTISFDIP PQEILTKDSVTISVDGVVYRVQ NATLAVANITNADSATR    |
| <i>M. musculus</i> AAC64173.1     | LPCTDSL IKVD MRTISFDIP PQEVLTKDSVTISVDGVVYRVQ NATLAVANITNADSATR   |
| <i>D. melanogaster</i> AFH04298.1 | LPCIDSYARVDLRTRTYDVPPQEVLT KDSTVSVDVAVVYRVSNATVS IANVENAHHSTR     |
| <i>C. elegans</i> NP_509202.1     | IPCIDTYRKIDLRVVSYPVPPQEILSKDSVTVSVDVAVVYFR TSDPIASVNNVDDAIYSTK    |
| <i>H. sapiens</i> -NP_004090.4    | LLAQTTLRNVLG TKNLSQILSDREEIAHNMQSTLDDATDAWG I KVERVEIKDVKLPVQLQ   |
| <i>M. musculus</i> AAC64173.1     | LLAQTTLRNALG TKNLSQILSDREEIAHNMQSTLDDATD DWG I KVERVEIKDVKLPVQLQ  |
| <i>D. melanogaster</i> AFH04298.1 | LLAQTTLRNLTMGTRHLHEILSERMTISGTMQVQLDEATDAWG I KVERVEIKDVRLPVQLQ   |
| <i>C. elegans</i> NP_509202.1     | LLAQTTLRNALGMKTLTEMLTEREAI AQLCETILDEGTEHWGVKVERVEVKD IRLPQQLT    |
| <i>H. sapiens</i> -NP_004090.4    | RAMAAEAEASREARAKVIAAEGEMNASRALKEASMVITESPAALQLRYLQTLTTIAAEKN      |
| <i>M. musculus</i> AAC64173.1     | RAMAAEAEAAAREARAKVIAAEGEMNASRALKEASMVITESPAALQLRYLQTLTTIAAEKN     |
| <i>D. melanogaster</i> AFH04298.1 | RAMAAEAEAAAREARAKVIAAEGEQKASRALREASEVIGDSPAALQLRYLQTLNTISAEKN     |
| <i>C. elegans</i> NP_509202.1     | RAMAAEAEAAAREARAKVIAAEGEQKASRALKEAADVIQANPVALQLRHQLALNSIAAEHN     |
| <i>H. sapiens</i> -NP_004090.4    | STIVFPLPIDMLQGGIIGAKHSHLG-----                                    |
| <i>M. musculus</i> AAC64173.1     | STIVFPLPVDMLQGGIMGSNH-----                                        |
| <i>D. melanogaster</i> AFH04298.1 | STIVFPLPIDLITYFLKTNEATTQQNARAAAAAIGNTPPPLQLAPQQQMGGQQQPQYQQP      |
| <i>C. elegans</i> NP_509202.1     | STIVFPVPVEMFGAFMKKDQ-----                                         |
| <i>H. sapiens</i> -NP_004090.4    | -----                                                             |
| <i>M. musculus</i> AAC64173.1     | -----                                                             |
| <i>D. melanogaster</i> AFH04298.1 | QQQQQQYQPQQQQQQQQQQPQQQDQLYQQGQQISSAM                             |
| <i>C. elegans</i> NP_509202.1     | -----                                                             |

ju1057(A to V)

Figure 1- S1
