# Supplementary figures and images for: Regulation of neuronal axon specification by glia-neuron gap junctions in C. elegans
Source: eLife journal article supplement (doi:10.7554/elife.19510), 2016-10-21

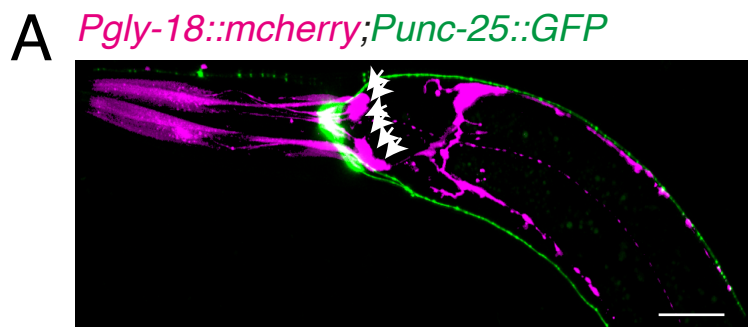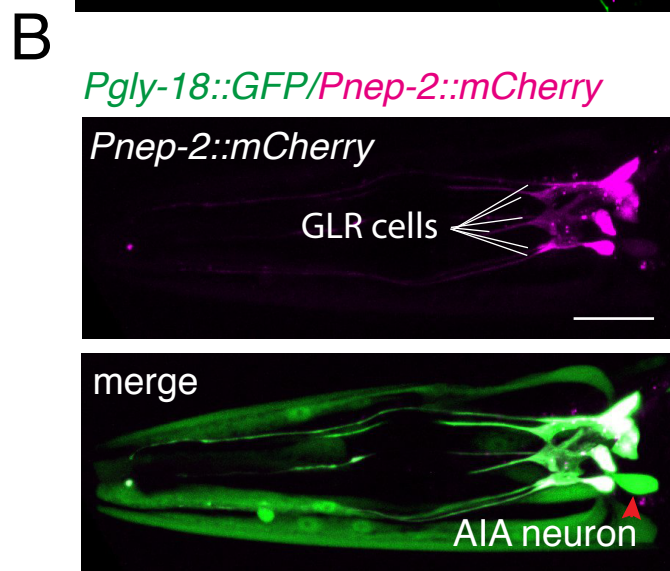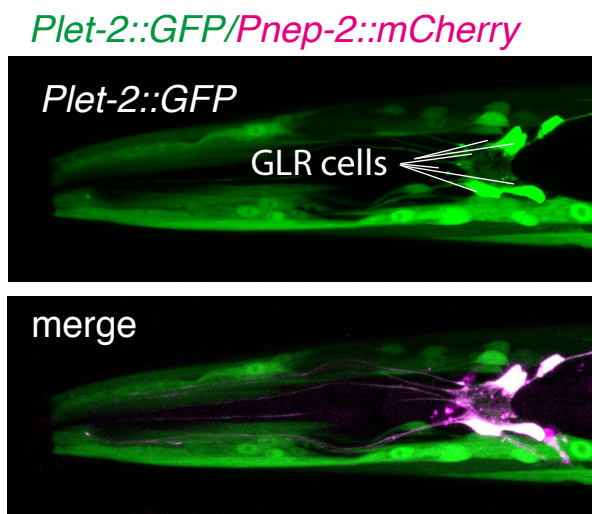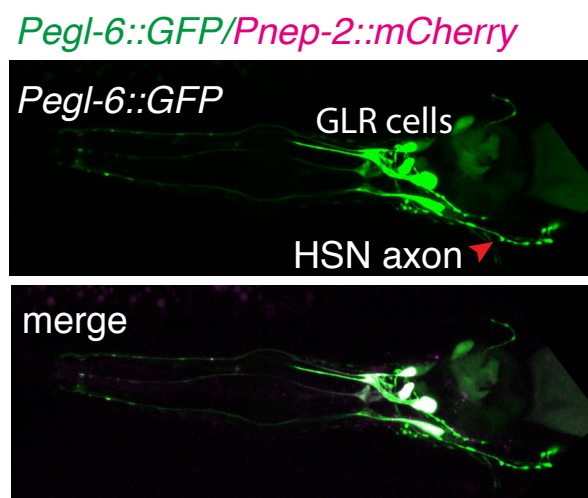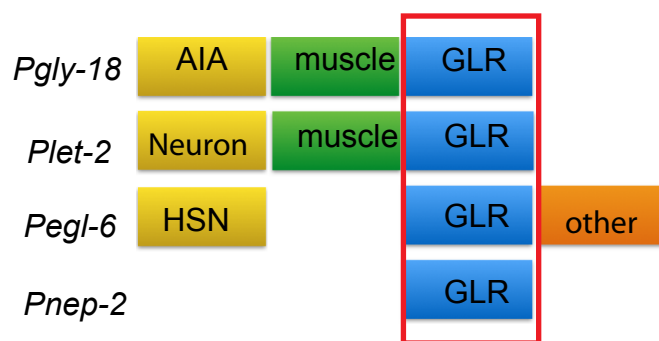

Figure2- S1

Supplement: supp [file elife-19510-supp-v1.zip]

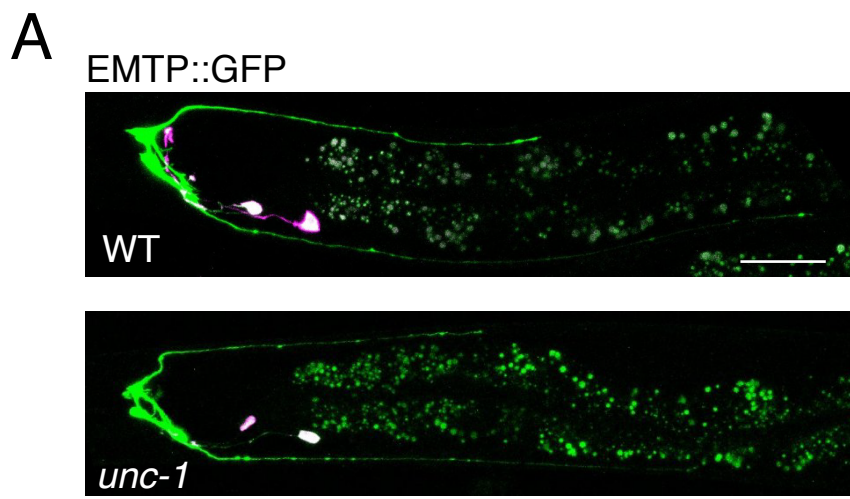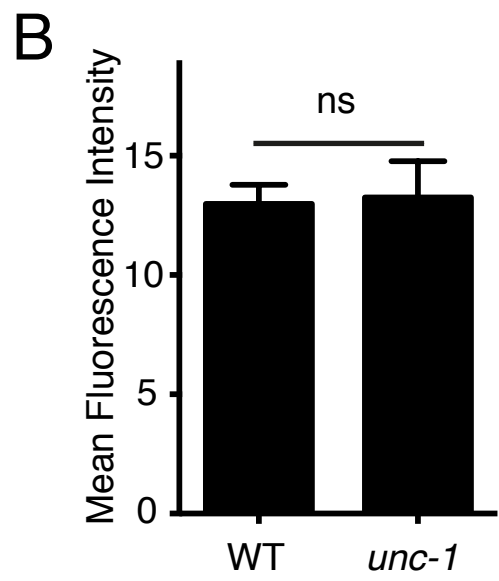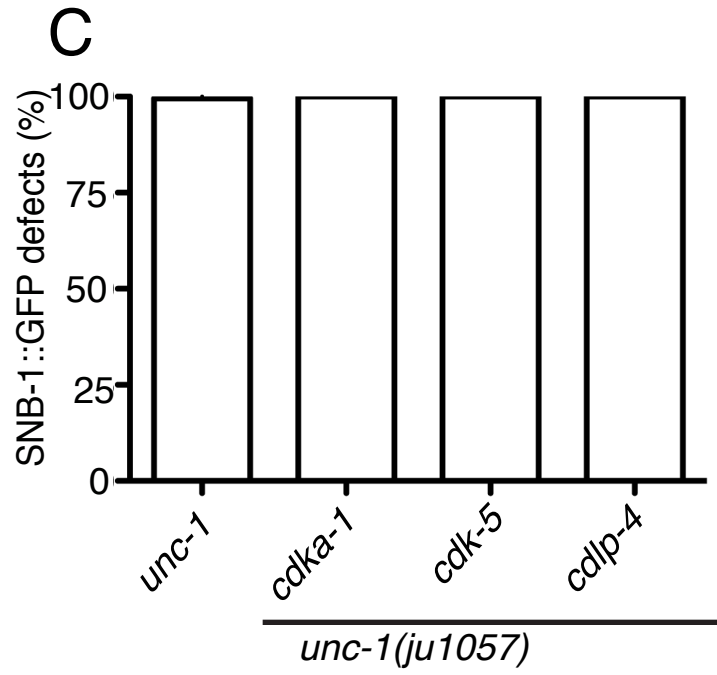

Figure 3-S1

Supplement: supp [file elife-19510-supp-v1.zip]

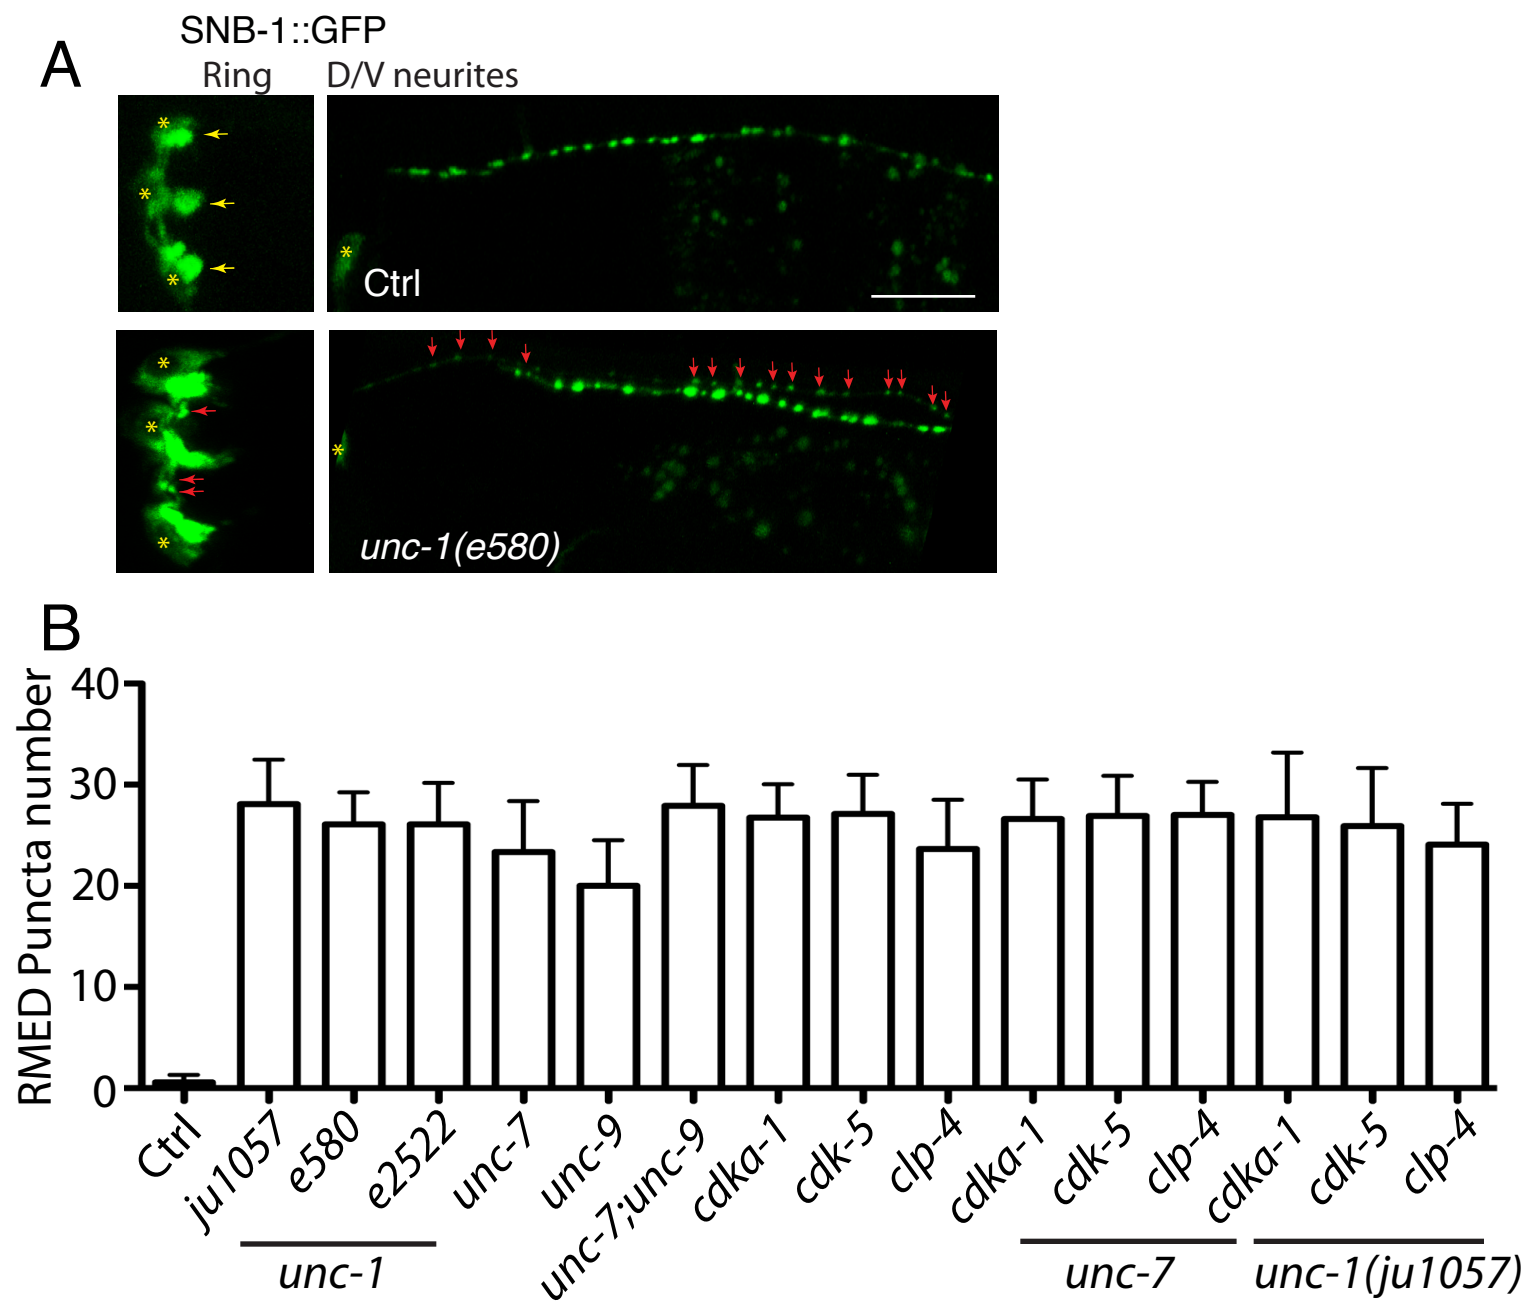

Figure1- S2

Supplement: supp [file elife-19510-supp-v1.zip]
